# Supplementary material
Source: Springer Nature journal article supplement (https://www.springermedizin.de/resource/supplementary/12943_2012_1031_MOESM6_ESM.pdf/9552130)

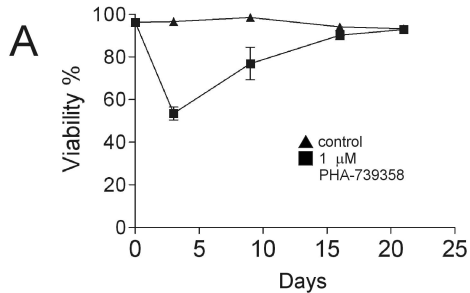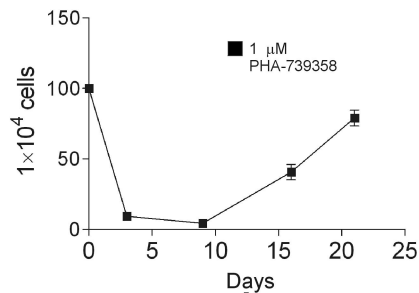

Pt2  
Ph+ ALL  
T315I

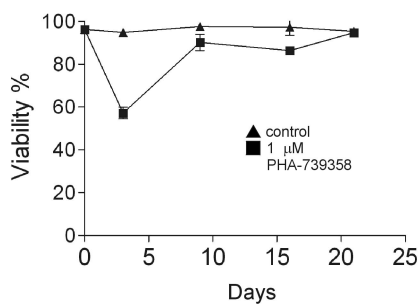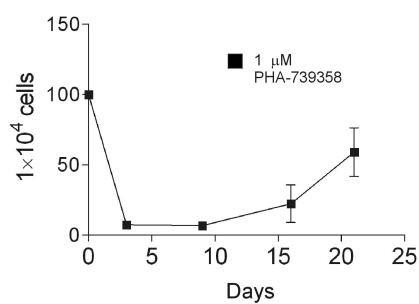

UCSF02  
Ph+ ALL  
no mutation

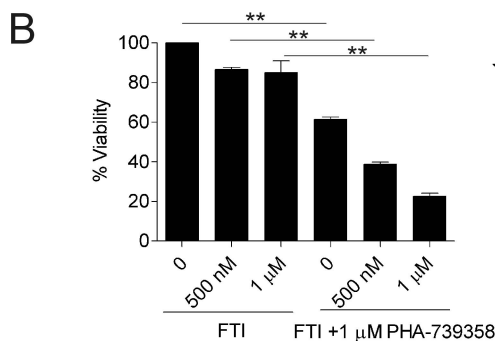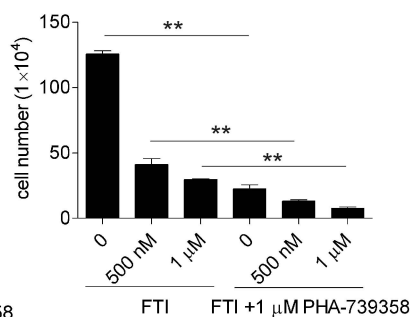

Pt2

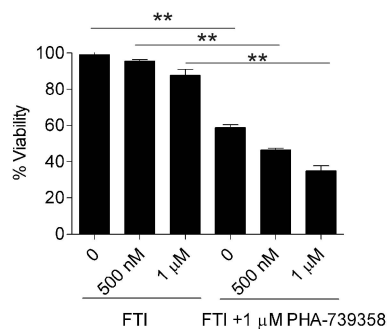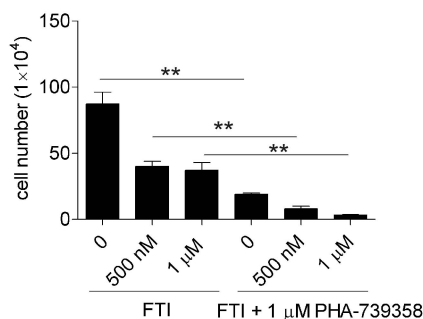

UCSF02

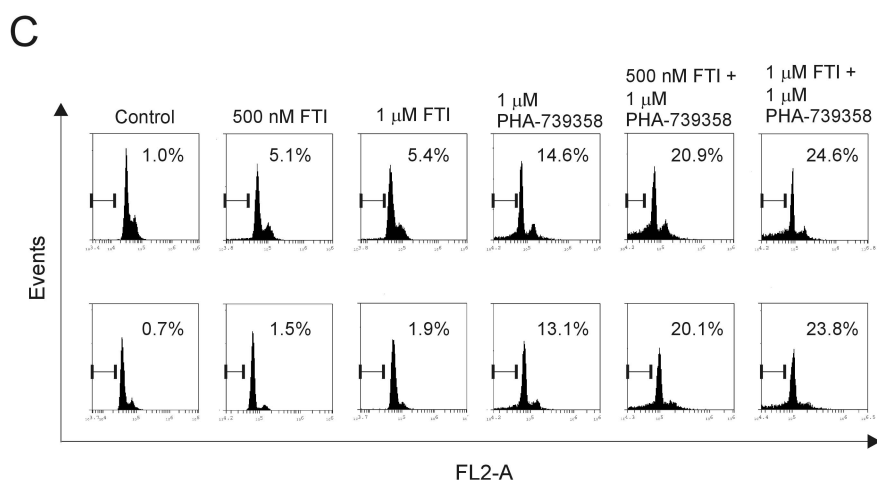

Pt2

UCSF02

Supplement: MOESM6 [file 9552130]
